# Supplementary figures and images for: Cell Viability Study of ZnCuInS/ZnS–TPPS4 Conjugates against Different Cell Lines as a Promising Fluorescent Probe
Source: MDPI journal article supplement (doi:10.3390/org4010010), 2023-03-17

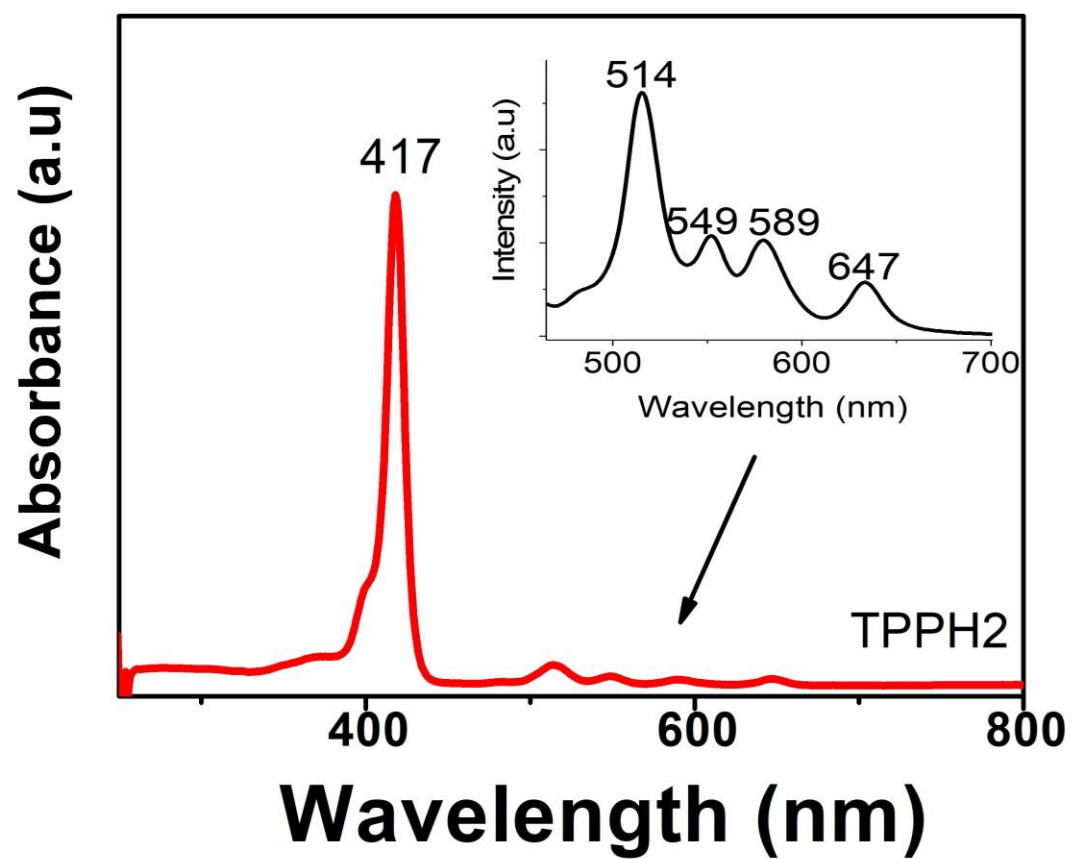

Figure S1. UV spectra of TPPH<sub>2</sub>.

Supplement: s1 [file s1]
